# Supplementary material
Source: MDPI journal article supplement (https://www.mdpi.com/1999-4907/8/9/314)
Supplement: s1 [file s1]

## Supplementary Materials

### Seasonal dynamics of litterfall in a sub-alpine spruce-fir forest on the eastern Tibetan Plateau: allometric scaling relationships based on one year of observations

Changkun Fu, Wanqin Yang, Bo Tan, Zhenfeng Xu, Yu Zhang, Jiaping Yang, Xiangyin Ni, Fuzhong Wu

**Table S1.** Some detailed characteristics of the three sites studied in a sub-alpine spruce-fir forest on the eastern Tibetan Plateau.

**Table S2.** Seasonal periods, months, sampling times and the corresponding sampling time series. MG: middle growing season, LG: late growing season, SF: snow-formation period, SC: snow-cover period, ST: snow-melting period, and EG: early growing season. August 1st, 2015, was the first day of the sampling time series.

**Table S3.** Total annual litter production of each species in a spruce-fir forest on the eastern Tibetan Plateau. Values are the means±standard deviation.

**Table S4.** Comparisons of aboveground litter production based on results from previous studies and the present observations. A slash indicates that the information is not available in the literature.

**Figure S1.** Relationship between total and foliar litter production. The linear equation, adjusted  $R^2$ ,  $p$  and  $n$  value are shown.

**Figure S2.** Cumulative data of Litter production of annual total litter (a), foliar litter (b), woody litter (c), reproductive litter (d), epiphytic litter (e) and miscellaneous litter (f) in the sub-alpine forest from August 2015 to July 2016. MG: middle growing season, LG: late growing season, SF: snow-formation period, SC: snow-cover period, ST: snow-melting period, and EG: early growing season. August 1st, 2015, was the first day of the sampling time series. The vertical scale varies from graph to graph.

**Table S1.** Some detailed characteristics of the three sites studied in a sub-alpine spruce-fir forest on the eastern Tibetan Plateau.

| No. | Detailed characteristics          | Site 1                            | Site 2                            | Site 3                            |
|-----|-----------------------------------|-----------------------------------|-----------------------------------|-----------------------------------|
| 1   | Area (m <sup>2</sup> )            | 50×50-m                           | 50×50-m                           | 50×50-m                           |
| 2   | Geographic coordinates (°)        | 31.23~31.32 N, 102.88~102.95 E    |                                   |                                   |
| 3   | Mean annual temperature (°C)      | 2.7                               | 2.7                               | 2.7                               |
| 4   | Altitude (above sea level, m)     | 3006                              | 3009                              | 3011                              |
| 5   | Slope degree (°)                  | 10~20                             | 15~20                             | 10~15                             |
| 6   | Aspect (°)                        | Southeast 38~52                   |                                   |                                   |
| 7   | Tree age (years)                  | 60~150                            | 60~180                            | 65~160                            |
| 8   | Canopy openness                   | 0.20                              | 0.25                              | 0.20                              |
| 9   | Density (trees·ha <sup>-1</sup> ) | 1109 (fir 28.2%,<br>spruce 42.7%) | 1117 (fir 29.1%,<br>spruce 44.4%) | 1098 (fir 28.9%,<br>spruce 44.1%) |
|     | 1) Evergreen & tree (%)           | 70.9                              | 73.5                              | 73.0                              |
|     | 2) Evergreen & shrub (%)          | 0                                 | 0                                 | 0                                 |
|     | 3) Deciduous & tree (%)           | 10.9                              | 12.7                              | 11.2                              |
|     | 4) Deciduous & shrub (%)          | 18.2                              | 13.8                              | 15.8                              |

**Table S2.** Seasonal periods, months, sampling times and the corresponding sampling time series. MG: middle growing season, LG: late growing season, SF: snow-formation period, SC: snow-cover period, ST: snow-melting period, and EG: early growing season. August 1st, 2015, was the first day of the sampling time series.

| Seasonal periods           | MG         | LG         |            | SF         | SC         |            |            |            | ST         | EG        |            | MG         |     |     |
|----------------------------|------------|------------|------------|------------|------------|------------|------------|------------|------------|-----------|------------|------------|-----|-----|
|                            | Aug., 2015 | Sep., 2015 | Oct., 2015 | Nov., 2015 | Dec., 2015 | Jan., 2016 | Feb., 2016 | Mar., 2016 | Apr., 2016 | May, 2016 | Jun., 2016 | Jul., 2016 |     |     |
| Sampling times             | 1          | 1          | 2          | 1          | 1          |            |            |            | 2          | 1         | 1          | 1          |     |     |
| Sampling time series (d)   | 31         | 61         | 76         | 92         | 122        | 244        |            |            |            | 259       | 274        | 305        | 335 | 366 |
| Sample collection days (d) | 31         | 30         | 15         | 16         | 30         | 122        |            |            |            | 15        | 15         | 31         | 30  | 31  |

**Table S3.** Total annual litter production of each species in a spruce-fir forest on the eastern Tibetan Plateau. Values are the mean±standard deviation ( $n=3$ ).

| Species                             | Litter production<br>(kg·ha <sup>-1</sup> ·yr <sup>-1</sup> ) | Percentage<br>(%) | Species type    | Basal area<br>(m <sup>2</sup> ·ha <sup>-1</sup> ) | Canopy<br>cover (%) |
|-------------------------------------|---------------------------------------------------------------|-------------------|-----------------|---------------------------------------------------|---------------------|
| <i>Abies faxoniana</i>              | 923.67±216.78                                                 | 38.81±11.71       | Evergreen tree  | 10.2±3.4                                          | 67.9±6.5            |
| <i>Acer caudatum</i>                | 9.77±5.57                                                     | 0.41±0.23         | Deciduous tree  | 0.2±0.1                                           | 2.8±0.6             |
| <i>Acer laisuense</i>               | 3.56±2.35                                                     | 0.15±0.10         | Deciduous tree  | 0.1±0.05                                          | 2.6±0.6             |
| <i>Berberis<br/>silva-taroucana</i> | 8.17±2.08                                                     | 0.34±0.09         | Deciduous shrub | /                                                 | 1.2±0.8             |
| <i>Cerasus conadenia</i>            | 240.42±30.85                                                  | 10.10±1.40        | Deciduous tree  | 0.5±0.2                                           | 6.6±2.2             |
| <i>Cerasus pleiocerasus</i>         | 94.46±37.07                                                   | 3.97±1.86         | Deciduous tree  | 0.3±0.2                                           | 5.5±1.2             |
| <i>Lonicera lanceolata</i>          | 1.04±0.04                                                     | 0.04±0.03         | Deciduous shrub | /                                                 | 0.2±0.1             |
| <i>Lonicera tangutica</i>           | 3.18±1.58                                                     | 0.13±0.07         | Deciduous shrub | /                                                 | 1.2±0.4             |
| <i>Lonicera trichosantha</i>        | 13.84±5.00                                                    | 0.58±0.21         | Deciduous shrub | /                                                 | 1.8±0.8             |
| <i>Padus racemosa</i>               | 1.57±0.76                                                     | 0.07±0.05         | Deciduous tree  | 0.2±0.1                                           | 2.5±0.9             |
| <i>Picea balfouriana</i>            | 703.21±186.75                                                 | 29.55±8.15        | Evergreen tree  | 11.3±4.1                                          | 52.1±3.2            |
| <i>Populus davidiana</i>            | 11.40±6.34                                                    | 0.48±0.29         | Deciduous tree  | 0.2±0.05                                          | 2.9±0.5             |
| <i>Rosa omeiensis</i>               | 13.55±6.34                                                    | 0.57±0.27         | Deciduous shrub | /                                                 | 1.9±0.5             |
| <i>Rubus parvifolius</i>            | 1.04±0.02                                                     | 0.04±0.02         | Deciduous shrub | /                                                 | 0.3±0.1             |
| <i>Salix cupularis</i>              | 55.92±5.96                                                    | 2.35±0.25         | Deciduous shrub | /                                                 | 3.8±0.5             |
| <i>Salix luctuosa</i>               | 5.33±3.12                                                     | 0.22±0.13         | Deciduous shrub | /                                                 | 0.8±0.4             |
| <i>Salix paraplesia</i>             | 58.91±9.25                                                    | 2.48±0.29         | Deciduous shrub | /                                                 | 4.4±1.5             |
| <i>Sorbus scalaris</i>              | 45.09±9.88                                                    | 1.89±0.42         | Deciduous tree  | 0.2±0.1                                           | 3.1±1.7             |

**Table S4.** Comparisons of aboveground litter production based on results from previous studies and the present observations. A slash indicates that the information is not available in the literature.

| Forest type             | Study area                   | Altitude<br>(above sea<br>level, m) | Geographic<br>coordinates (°)   | Mean annual<br>temperature<br>(°C) | Density<br>(trees·ha <sup>-1</sup> ) | Tree<br>DBH<br>(cm) | Tree<br>height<br>(m) | Tree<br>age<br>(years) | Average aboveground<br>litter production<br>(kg·ha <sup>-1</sup> ·yr <sup>-1</sup> ) | Peak<br>months of<br>litterfall | Reference  |
|-------------------------|------------------------------|-------------------------------------|---------------------------------|------------------------------------|--------------------------------------|---------------------|-----------------------|------------------------|--------------------------------------------------------------------------------------|---------------------------------|------------|
| Spruce-dominated forest | Wanglang, China              | 2900                                | 32.91N, 104.05E                 | 1.2                                | 650                                  | /                   | /                     | 350                    | 1212                                                                                 | 2, 3, 10                        | 17         |
| Norway spruce forest    | Southern Finland             | 252                                 | 66.332N, 26.645E                | -4–13                              | 621                                  | /                   | 29.5                  | 70–118                 | 1170                                                                                 | 3, 8, 9                         | 20         |
| Fir-dominated forest    | Wanglang, China              | 2600                                | 32.98N, 104.08E                 | 2.9                                | 1049                                 | /                   | /                     | 200                    | 3483                                                                                 | 2, 10                           | 17         |
| Spruce-fir forest       | Changbai Mountain, China     | 1110–1180                           | 42.05–42.4N,<br>128.07–128.25E  | -3.7–2.5                           | 1352 (fir 35%,<br>spruce 38%)        | 19.3                | 14.2                  | 60–200                 | 2472                                                                                 | 7, 10                           | 32         |
| Spruce-fir forest       | Xiaoxing'an Mountains, China | 285–688                             | 48.03N,<br>128.67–129.25E       | -0.5                               | 944 (fir 51%,<br>spruce 13%)         | 17.41               | 16.54                 | 50–200                 | 3440                                                                                 | 9, 10                           | 19         |
| Spruce-fir forest       | East-central Maine, USA      | 60                                  | 45.10N, 68.06 W                 | 5–6                                | (fir 27.3%, spruce<br>50%)           | /                   | /                     | 45–130                 | 2105                                                                                 | /                               | 34         |
| Spruce-fir forest       | Bipenggou, China             | 3006–3011                           | 31.23–31.32N,<br>102.88–102.95E | 2.7                                | 1108 (fir 28.7%,<br>spruce 43.8%)    | 18.2                | 13.4                  | 60–180                 | 2380                                                                                 | 4, 10                           | This study |

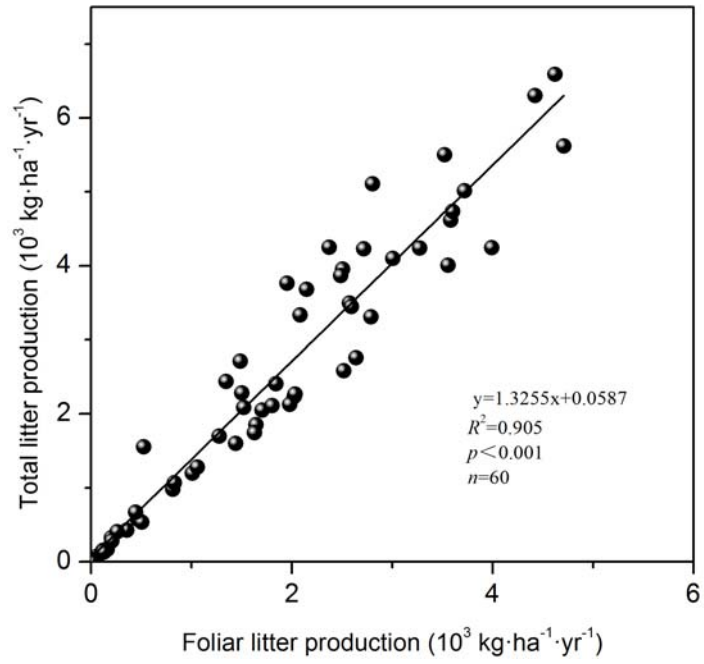

**Figure S1.** Relationship between total and foliar litter production. The linear equation, adjusted  $R^2$ ,  $p$  and  $n$  value are shown.

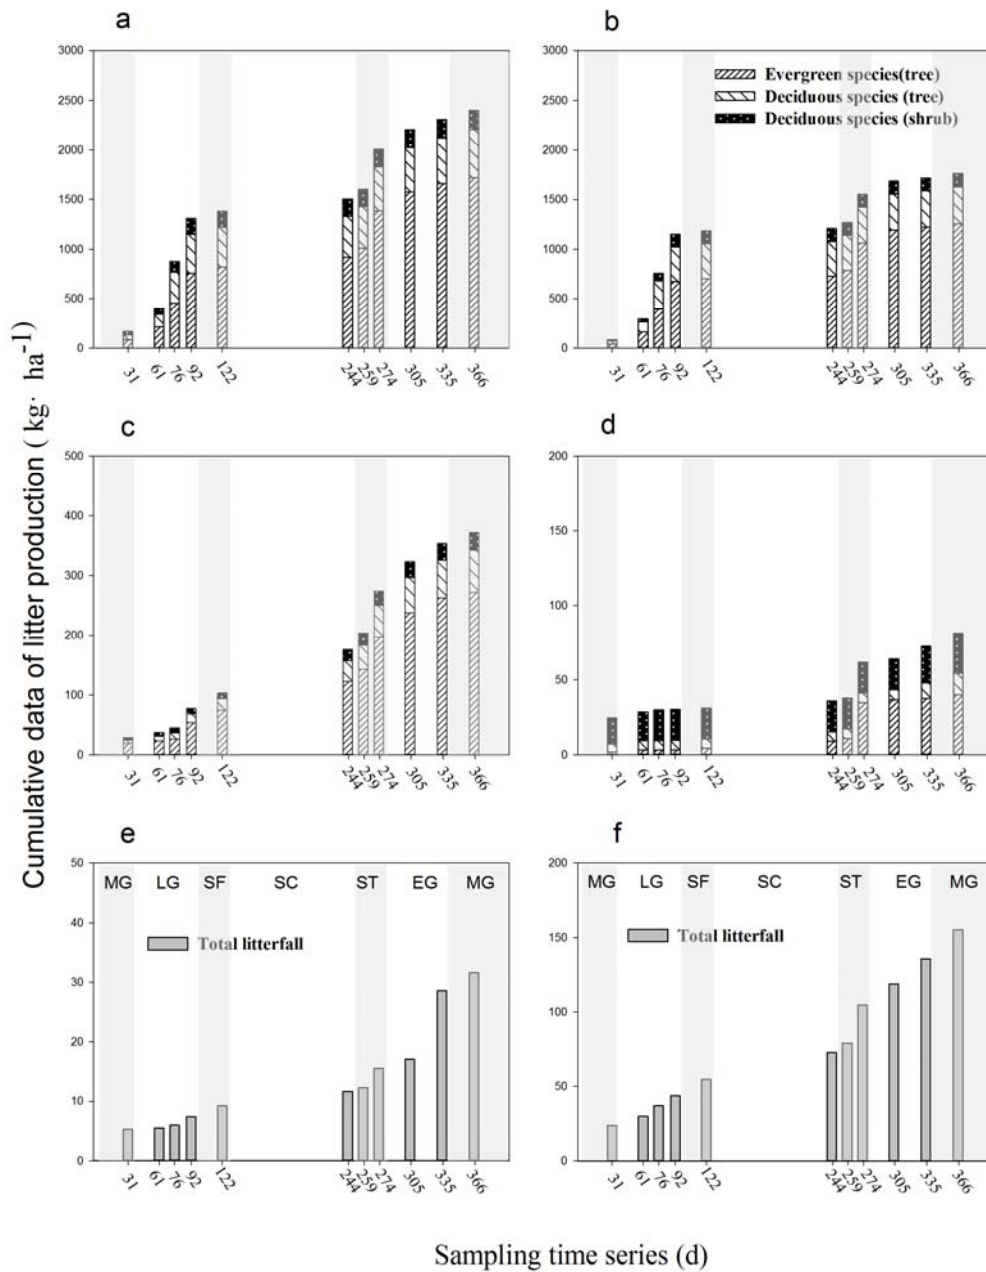

**Figure S2.** Cumulative data of Litter production of annual total litter (a), foliar litter (b), woody litter (c), reproductive litter (d), epiphytic litter (e) and miscellaneous litter (f) in the sub-alpine forest from August 2015 to July 2016. MG: middle growing season, LG: late growing season, SF: snow-formation period, SC: snow-cover period, ST: snow-melting period, and EG: early growing season. August 1st, 2015, was the first day of the sampling time series. The vertical scale varies from graph to graph.
